# Supplementary material for: A comparison of tools and techniques for stabilising unmanned aerial system (UAS) imagery for surface flow observations
Source: Copernicus journal article supplement (doi:10.5194/hess-25-5105-2021), 2021-09-22
Supplement: Supplementary file 1 [file hess-25-5105-2021-supplement.zip]

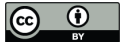

## *Supplement of*

# **A comparison of tools and techniques for stabilising unmanned aerial system (UAS) imagery for surface flow observations**

**Robert Ljubičić et al.**

*Correspondence to:* Robert Ljubičić (rljubicic@grf.bg.ac.rs)

- hess-25-5105-2021-supplement-title-page.pdf
- SVF\_Alpine
  - alpine\_00\_unstabilised.jpg
  - alpine\_01\_fft-cuas.jpg
  - alpine\_02\_fft-dch.jpg
  - alpine\_03\_ssims.jpg
  - alpine\_04\_klt-iv.jpg
  - alpine\_05\_fast.jpg
  - alpine\_06\_akaze.jpg
  - alpine\_07\_blender.jpg
- SVF\_Kolubara
  - !unstabilised
    - \* unstabilised\_051\_tilt.jpg
    - \* unstabilised\_151\_scale.jpg
    - \* unstabilised\_351\_rotation.jpg
    - \* unstabilised\_551\_rot+scale.jpg
  - akaze
    - \* akaze\_051\_tilt.jpg
    - \* akaze\_151\_scale.jpg
    - \* akaze\_351\_rotation.jpg
    - \* akaze\_551\_rot+scale.jpg
  - blender
    - \* blender\_051\_tilt.jpg
    - \* blender\_151\_scale.jpg
    - \* blender\_351\_rotation.jpg

- \* blender\_551\_rot+scale.jpg
- fast
  - \* fast\_051\_tilt.jpg
  - \* fast\_151\_scale.jpg
  - \* fast\_351\_rotation.jpg
  - \* fast\_551\_rot+scale.jpg
- fft-cuas
  - \* fft-cuas\_051\_tilt.jpg
  - \* fft-cuas\_151\_scale.jpg
  - \* fft-cuas\_351\_rotation.jpg
  - \* fft-cuas\_551\_rot+scale.jpg
- fft-dch
  - \* fft-dch\_051\_tilt.jpg
  - \* fft-dch\_151\_scale.jpg
  - \* fft-dch\_351\_rotation.jpg
  - \* fft-dch\_551\_rot+scale.jpg
- klt-iv
  - \* klt-iv\_051\_tilt.jpg
  - \* klt-iv\_151\_scale.jpg
  - \* klt-iv\_351\_rotation.jpg
  - \* klt-iv\_551\_rot+scale.jpg
- ssims
  - \* ssim\_051\_tilt.jpg
  - \* ssim\_151\_scale.jpg
  - \* ssim\_351\_rotation.jpg
  - \* ssim\_551\_rot+scale.jpg

The copyright of individual parts of the supplement might differ from the article licence.
